# Supplementary material for: Systematic study of the formation of the lanthanoid cubane cluster motif mediated by steric modification of diketonate ligands
Source: Royal Society of Chemistry journal article supplement (doi:10.1039/c1dt10580a), 2011-01-01

# Systematic study of the formation of the lanthanoid cubane cluster motif mediated by steric modification of diketonate ligands

Philip C. Andrews,<sup>a</sup> William J. Gee<sup>a</sup>, Peter C. Junk<sup>\*a</sup> and Jonathan G. MacLellan<sup>a</sup>

*School of Chemistry, Monash University, Clayton, Victoria, 3800, Australia.*

## Supplementary information

### Additional crystallographic data:

**Figure S1:** Molecular structure, X-ray data and refinement details for cluster **1**.

**Figure S2:** Molecular structure, X-ray data and refinement details for cluster **2**.

**Table S1:** Selected bond lengths (Å) and angles (°) for **3**.

**Table S2:** Selected bond lengths (Å) and angles (°) for **7**.

**Table S3:** Selected bond lengths (Å) and angles (°) for **8**.

**Table S4:** Selected bond lengths (Å) and angles (°) for **9**.

### Mechanistic considerations:

**Figure S3:** Examples of ‘capping and peripheral faces for clusters **3,7** and **8**.

**Figure S4:** Mass spectrum of **3** highlighting evidence of intermediate dimer.

**Figure S5:** Mass spectrum of **8** highlighting evidence of intermediate dimer.

**Figure S6:** Mass spectrum of **9** highlighting evidence of intermediate dimer.

### Molecular structure of cluster 1.

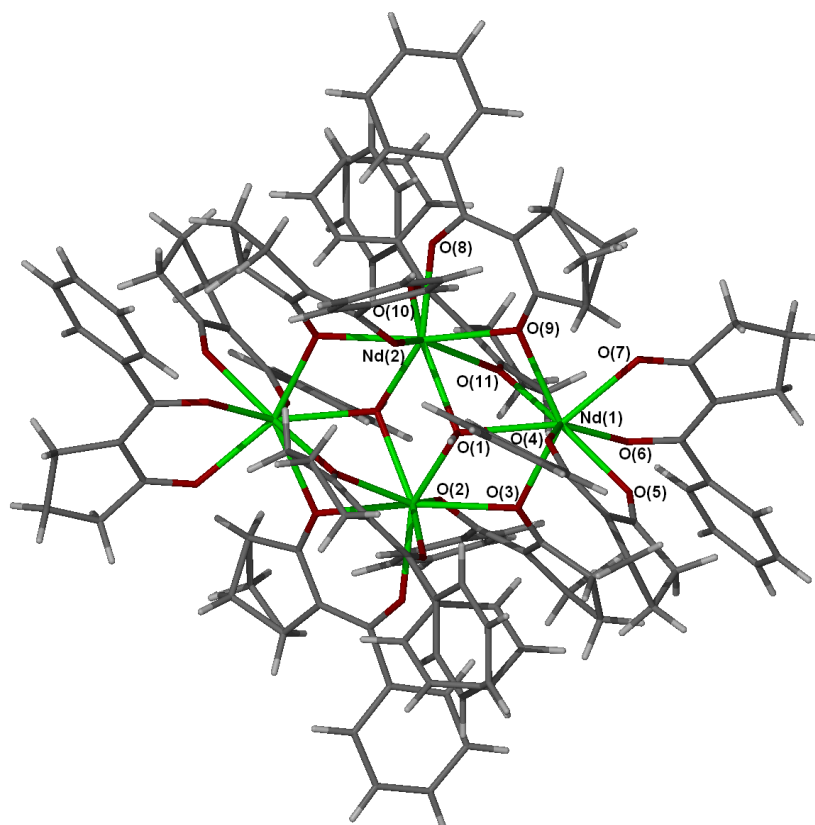

#### [Nd<sub>4</sub>(μ<sub>3</sub>-OH)<sub>2</sub>(pmc)<sub>10</sub>] (1)

|                                   |                                                                   |                          |
|-----------------------------------|-------------------------------------------------------------------|--------------------------|
| Empirical formula                 | C <sub>120</sub> H <sub>112</sub> Nd <sub>4</sub> O <sub>22</sub> |                          |
| Formula weight                    | 2483.06                                                           |                          |
| Temperature                       | 100(2) K                                                          |                          |
| Wavelength                        | 0.773747861 Å (synchrotron)                                       |                          |
| Crystal system, space group       | Triclinic, <i>P</i> -1                                            |                          |
| Unit cell dimensions              | <i>a</i> = 12.378(3) Å                                            | <i>α</i> = 66.73(3) deg. |
|                                   | <i>b</i> = 15.353(3) Å                                            | <i>β</i> = 69.06(3) deg. |
|                                   | <i>c</i> = 15.713(3) Å                                            | <i>γ</i> = 74.93(3) deg. |
| Volume                            | 2537.3(9) Å <sup>3</sup>                                          |                          |
| F(000)                            | 1248                                                              |                          |
| Crystal size                      | 0.03 x 0.03 x 0.02 mm                                             |                          |
| Theta range for data collection   | 1.84 to 25.00 deg.                                                |                          |
| Limiting indices                  | -13 ≤ <i>h</i> ≤ 13, -16 ≤ <i>k</i> ≤ 16, -17 ≤ <i>l</i> ≤ 17     |                          |
| Reflections collected / unique    | 25247 / 6477 [R(int) = 0.0344]                                    |                          |
| Completeness to theta = 25.00     | 93.6 %                                                            |                          |
| Absorption correction             | Semi-empirical from equivalents                                   |                          |
| Refinement method                 | Full-matrix least-squares on F <sup>2</sup>                       |                          |
| Data / restraints / parameters    | 6477 / 2 / 659                                                    |                          |
| Goodness-of-fit on F <sup>2</sup> | 1.018                                                             |                          |
| Final R indices [I > 2σ(I)]       | R1 = 0.0405, wR2 = 0.1073                                         |                          |
| R indices (all data)              | R1 = 0.0500, wR2 = 0.1143                                         |                          |

## Molecular structure of cluster 2.

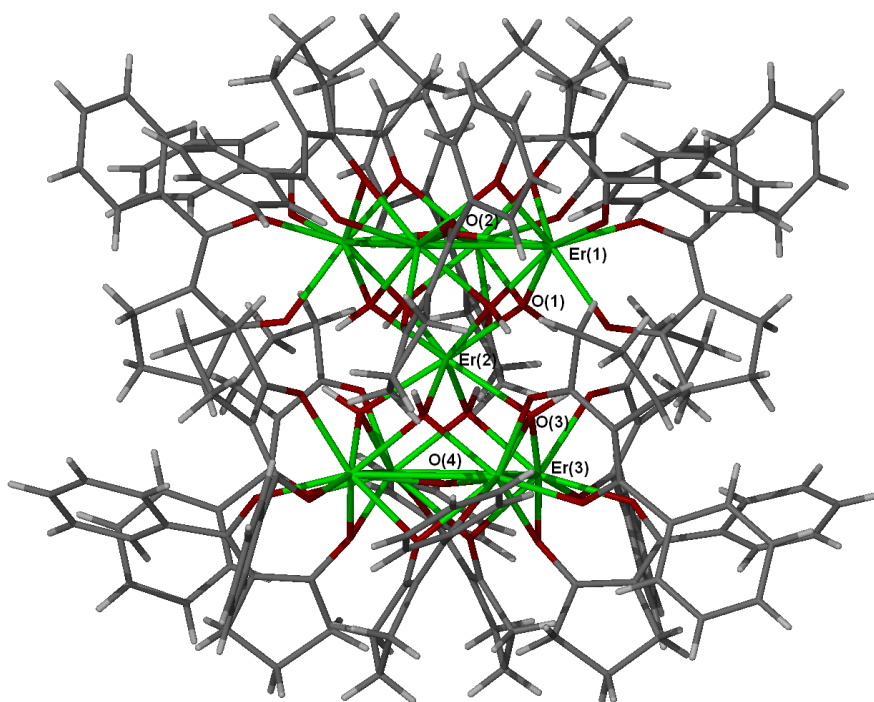

### [HNEt<sub>3</sub>][Er<sub>9</sub>(μ<sub>4</sub>-O)<sub>2</sub>(μ<sub>3</sub>-OH)<sub>8</sub>(pmc)<sub>16</sub>] (2)

|                                   |                                                                   |             |
|-----------------------------------|-------------------------------------------------------------------|-------------|
| Empirical formula                 | C <sub>192</sub> H <sub>184</sub> Er <sub>9</sub> O <sub>42</sub> |             |
| Formula weight                    | 4668.73                                                           |             |
| Temperature                       | 173(2) K                                                          |             |
| Wavelength                        | 0.773747861 Å (synchrotron)                                       |             |
| Crystal system, space group       | Tetragonal, <i>I</i> 4                                            |             |
| Unit cell dimensions              | a = 21.708(3) Å                                                   | α = 90 deg. |
|                                   | b = 21.708(3) Å                                                   | β = 90 deg. |
|                                   | c = 25.682(5) Å                                                   | γ = 90 deg. |
| Volume                            | 12103(3) Å <sup>3</sup>                                           |             |
| F(000)                            | 4568                                                              |             |
| Crystal size                      | 0.09 x 0.08 x 0.06 mm                                             |             |
| Theta range for data collection   | 1.23 to 24.99 deg.                                                |             |
| Limiting indices                  | -19 ≤ h ≤ 25, -18 ≤ k ≤ 25, -23 ≤ l ≤ 30                          |             |
| Reflections collected / unique    | 22589 / 10010 [R(int) = 0.1029]                                   |             |
| Completeness to theta = 25.00     | 99.9 %                                                            |             |
| Absorption correction             | None                                                              |             |
| Refinement method                 | Full-matrix least-squares on F <sup>2</sup>                       |             |
| Data / restraints / parameters    | 10010 / 66 / 434                                                  |             |
| Goodness-of-fit on F <sup>2</sup> | 0.996                                                             |             |
| Final R indices [I > 2σ(I)]       | R1 = 0.0660, wR2 = 0.1572                                         |             |
| R indices (all data)              | R1 = 0.1035, wR2 = 0.1712                                         |             |

**Table S1:** Selected bond lengths (Å) and angles (°) for **3**.

| <b>Bond Lengths, Å</b> |          |                 |           |
|------------------------|----------|-----------------|-----------|
| Er(1)-O(1)             | 2.365(7) | Er(2)-O(2)      | 2.361(7)  |
| Er(1)-O(4)             | 2.366(8) | Er(2)-O(3)      | 2.426(10) |
| Er(3)-O(1)             | 2.337(8) | Er(4)-O(2)      | 2.345(8)  |
| Er(3)-O(4)             | 2.307(8) | Er(4)-O(3)      | 2.310(9)  |
| Er(1)-O(2)             | 2.357(7) | Er(2)-O(2)      | 2.361(7)  |
| Er(3)-O(3)             | 2.365(8) | Er(4)-O(4)      | 2.406(8)  |
| <b>Bond Angles, °</b>  |          |                 |           |
| O(1)-Er(1)-O(4)        | 74.0(3)  | O(2)-Er(2)-O(3) | 74.0(3)   |
| O(4)-Er(3)-O(1)        | 75.7(3)  | O(3)-Er(4)-O(2) | 76.5(3)   |
| O(2)-Er(1)-O(1)        | 69.1(2)  | O(1)-Er(2)-O(2) | 69.7(2)   |
| O(2)-Er(1)-O(4)        | 68.7(3)  | O(1)-Er(2)-O(3) | 68.9(3)   |
| O(1)-Er(3)-O(3)        | 69.8(3)  | O(3)-Er(4)-O(4) | 70.2(3)   |
| O(4)-Er(3)-O(3)        | 71.0(3)  | O(2)-Er(4)-O(4) | 68.2(3)   |

**Table S2:** Selected bond lengths (Å) and angles (°) for **7**.

| <b>Bond Lengths, Å</b>        |           |                                            |           |
|-------------------------------|-----------|--------------------------------------------|-----------|
| Er(1)-O(1)                    | 2.305(4)  | Er(1)-O(6)                                 | 2.236(3)  |
| Er(1)-O(1) <sup>a</sup>       | 2.330(3)  | Er(1)-O(7)                                 | 2.306(4)  |
| Er(1)-O(1) <sup>b</sup>       | 2.375(5)  | Er(1)-Er(1) <sup>a</sup>                   | 3.6413(3) |
| Er(1)-O(2)                    | 2.269(4)  | Er(1)-Er(1) <sup>b</sup>                   | 3.8197(5) |
| Er(1)-O(3)                    | 2.255(4)  | Er(1)-Er(1) <sup>c</sup>                   | 3.6413(3) |
| <b>Bond Angles, °</b>         |           |                                            |           |
| O(1) <sup>a</sup> -Er(1)-O(1) | 74.67(13) | O(1) <sup>a</sup> -Er(1)-O(1) <sup>b</sup> | 73.35(13) |
| O(1) <sup>b</sup> -Er(1)-O(1) | 69.86(11) |                                            |           |

Symmetry Transformations: a = -x+1,-y+1,z; b = -y+1,x,-z+2; c = y,-x+1,-z+2.

**Table S3:** Selected bond lengths (Å) and angles (°) for **8**.

| <b>Bond Lengths, Å</b> |           |                 |           |
|------------------------|-----------|-----------------|-----------|
| Er(1)-O(1)             | 2.369(12) | Er(3)-O(1)      | 2.311(11) |
| Er(1)-O(2)             | 2.319(10) | Er(3)-O(3)      | 2.313(13) |
| Er(1)-O(3)             | 2.330(10) | Er(3)-O(4)      | 2.346(11) |
| Er(2)-O(1)             | 2.333(11) | Er(4)-O(2)      | 2.353(9)  |
| Er(2)-O(2)             | 2.302(11) | Er(4)-O(3)      | 2.341(11) |
| Er(2)-O(4)             | 2.337(10) | Er(4)-O(4)      | 2.362(11) |
| <b>Bond Angles, °</b>  |           |                 |           |
| O(2)-Er(1)-O(3)        | 68.5(3)   | O(2)-Er(1)-O(1) | 75.0(4)   |
| O(3)-Er(1)-O(1)        | 72.4(4)   | O(1)-Er(3)-O(4) | 68.1(4)   |
| O(2)-Er(2)-O(1)        | 76.1(4)   | O(3)-Er(3)-O(4) | 77.1(4)   |
| O(2)-Er(2)-O(4)        | 76.2(4)   | O(3)-Er(4)-O(2) | 67.7(3)   |
| O(1)-Er(2)-O(4)        | 67.9(4)   | O(3)-Er(4)-O(4) | 76.2(4)   |
| O(1)-Er(3)-O(3)        | 73.8(4)   | O(2)-Er(4)-O(4) | 74.7(4)   |

**Table S4:** Selected bond lengths (Å) and angles (°) for **9**.

| <b>Bond Lengths, Å</b> |           |                 |           |
|------------------------|-----------|-----------------|-----------|
| Er(1)-O(1)             | 2.350(10) | Er(2)-O(2)      | 2.315(8)  |
| Er(1)-O(4)             | 2.313(10) | Er(2)-O(3)      | 2.305(11) |
| Er(3)-O(4)             | 2.298(10) | Er(4)-O(1)      | 2.418(10) |
| Er(1)-O(2)             | 2.379(9)  | Er(4)-O(3)      | 2.353(10) |
| Er(3)-O(3)             | 2.335(10) | Er(4)-O(4)      | 2.374(9)  |
| <b>Bond Angles, °</b>  |           |                 |           |
| O(4)-Er(1)-O(1)        | 78.1(3)   | O(2)-Er(2)-O(3) | 74.8(3)   |
| O(4)-Er(3)-O(2)        | 67.9(3)   | O(3)-Er(4)-O(1) | 67.6(4)   |
| O(1)-Er(1)-O(2)        | 68.2(3)   | O(1)-Er(2)-O(2) | 69.6(3)   |
| O(4)-Er(1)-O(2)        | 67.2(3)   | O(1)-Er(2)-O(3) | 69.8(3)   |
| O(2)-Er(3)-O(3)        | 73.7(3)   | O(3)-Er(4)-O(4) | 68.5(3)   |
| O(4)-Er(3)-O(3)        | 70.1(3)   | O(1)-Er(4)-O(4) | 75.6(3)   |

**Figure S3:** Examples of ‘capping’ and ‘peripheral’ faces for clusters **3**, **7** and **8**.

Erbium cluster **3**:

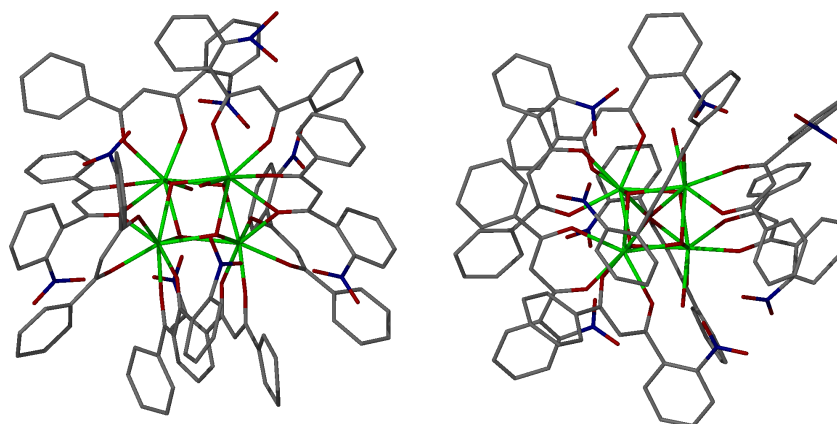

Erbium cluster **7**

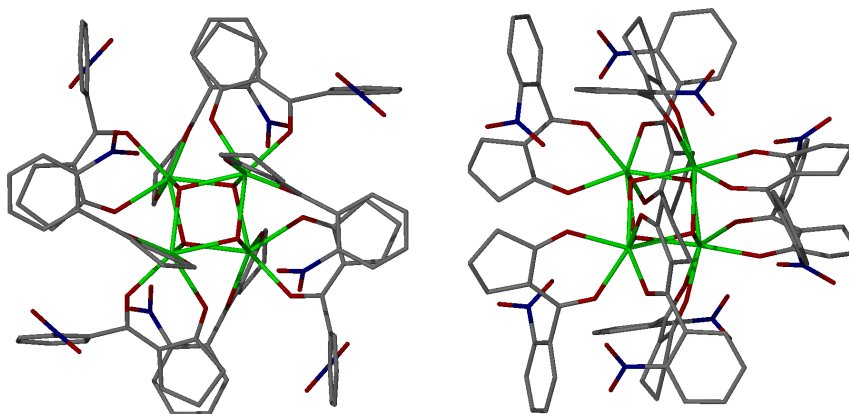

Erbium cluster **8**

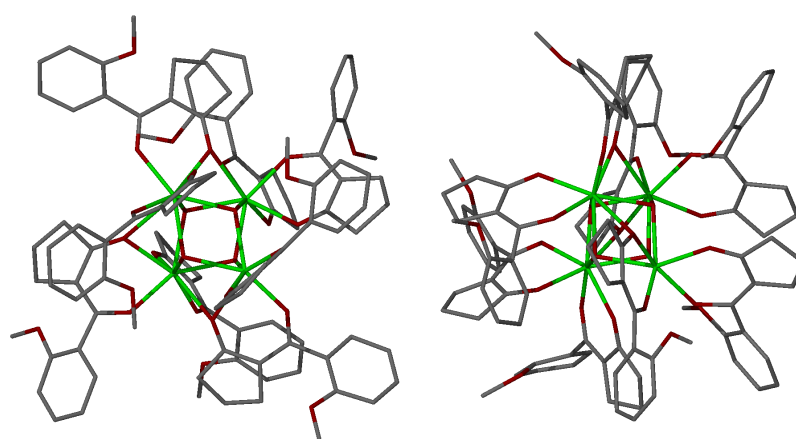

In each instance the capping face is on the left and a peripheral face on the right. The capping face either possesses or resembles a fourfold rotation axis ( $C_4$ ) while the peripheral faces possess or resemble a twofold rotation axis ( $C_2$ ) (seen as horizontal here).

Figure S4: Mass spectra of intermediate species for motif 3.

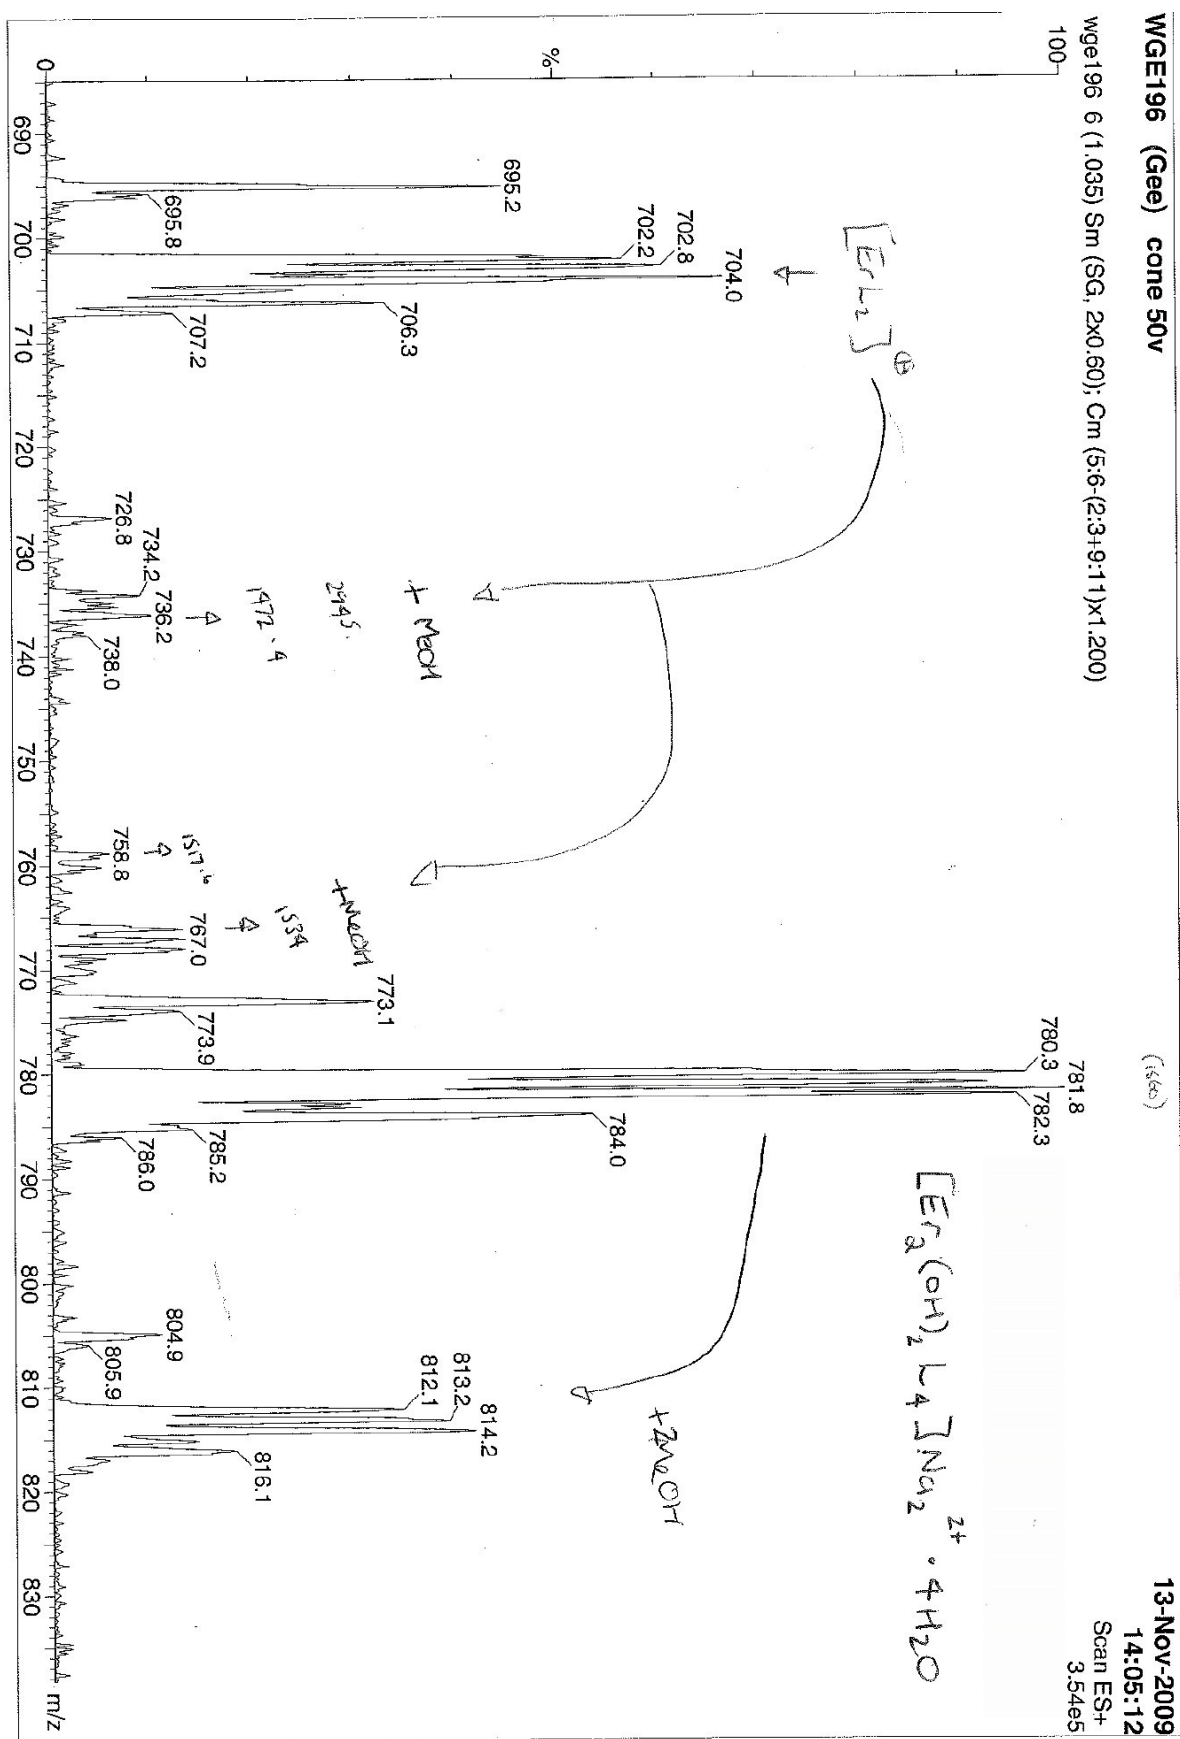

Figure S5: Mass spectra of intermediate species for motif 8.

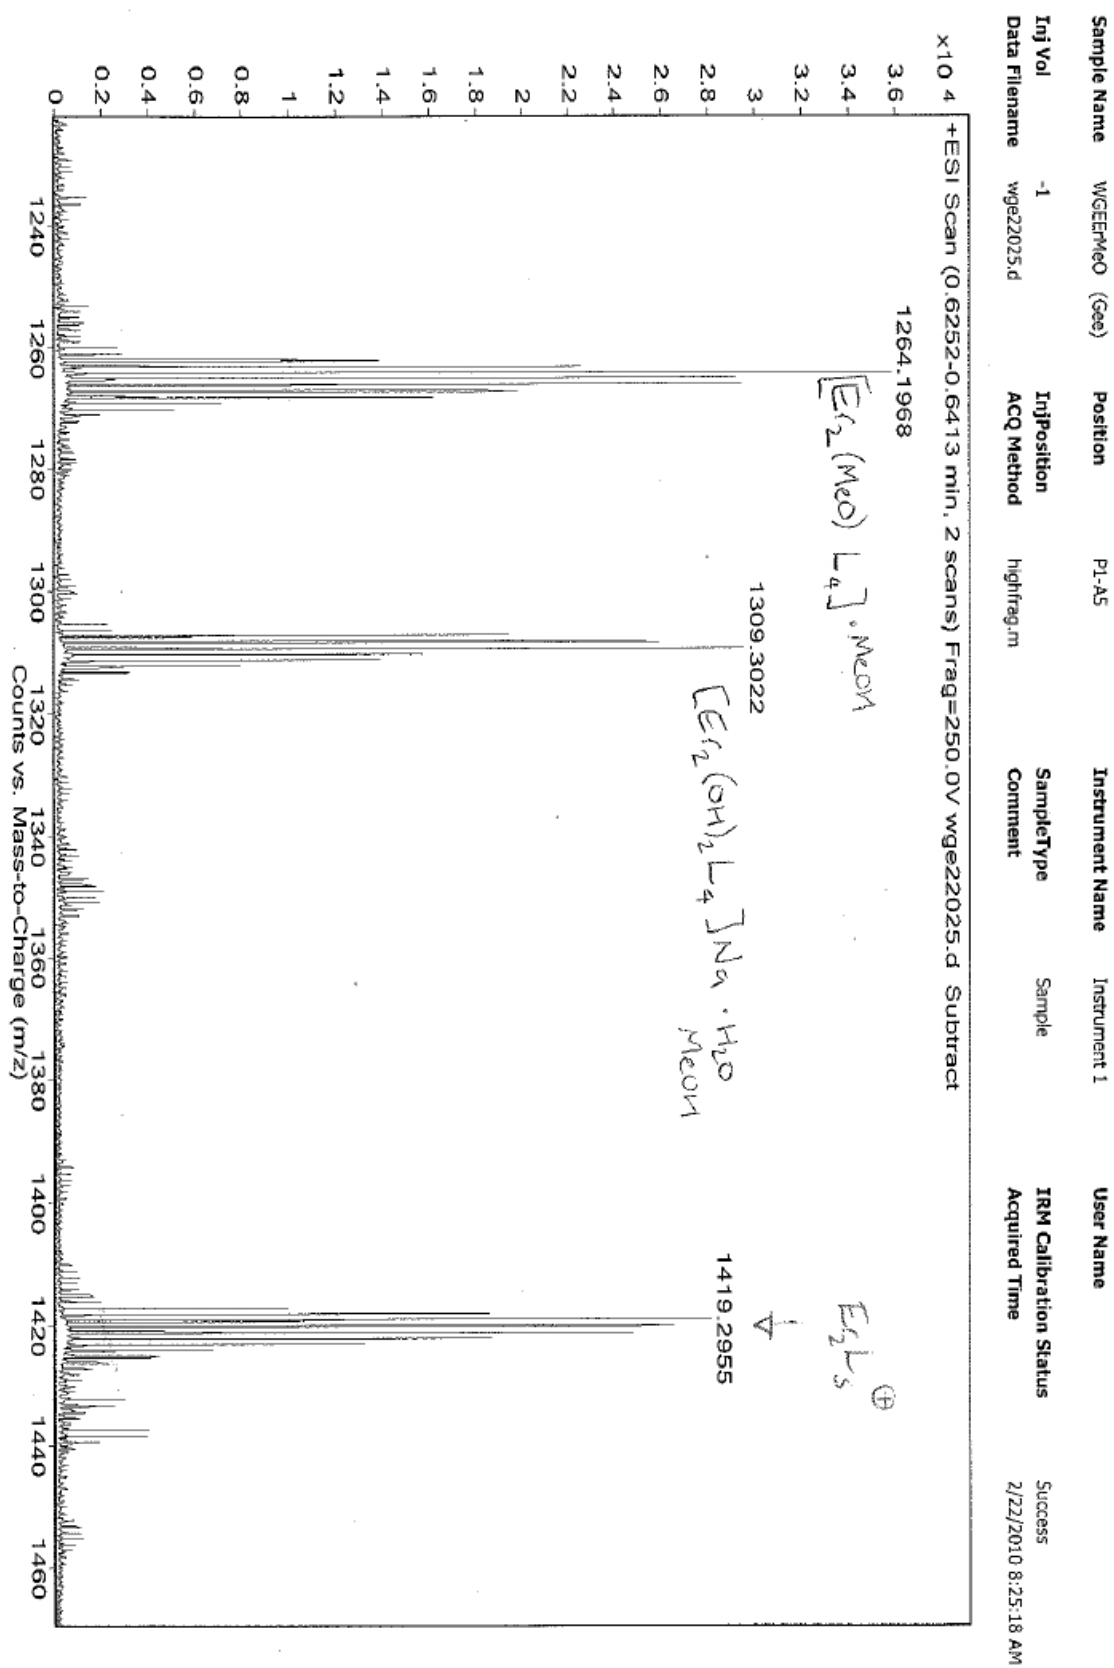



Figure S5: Mass spectra of intermediate species for motif 9.

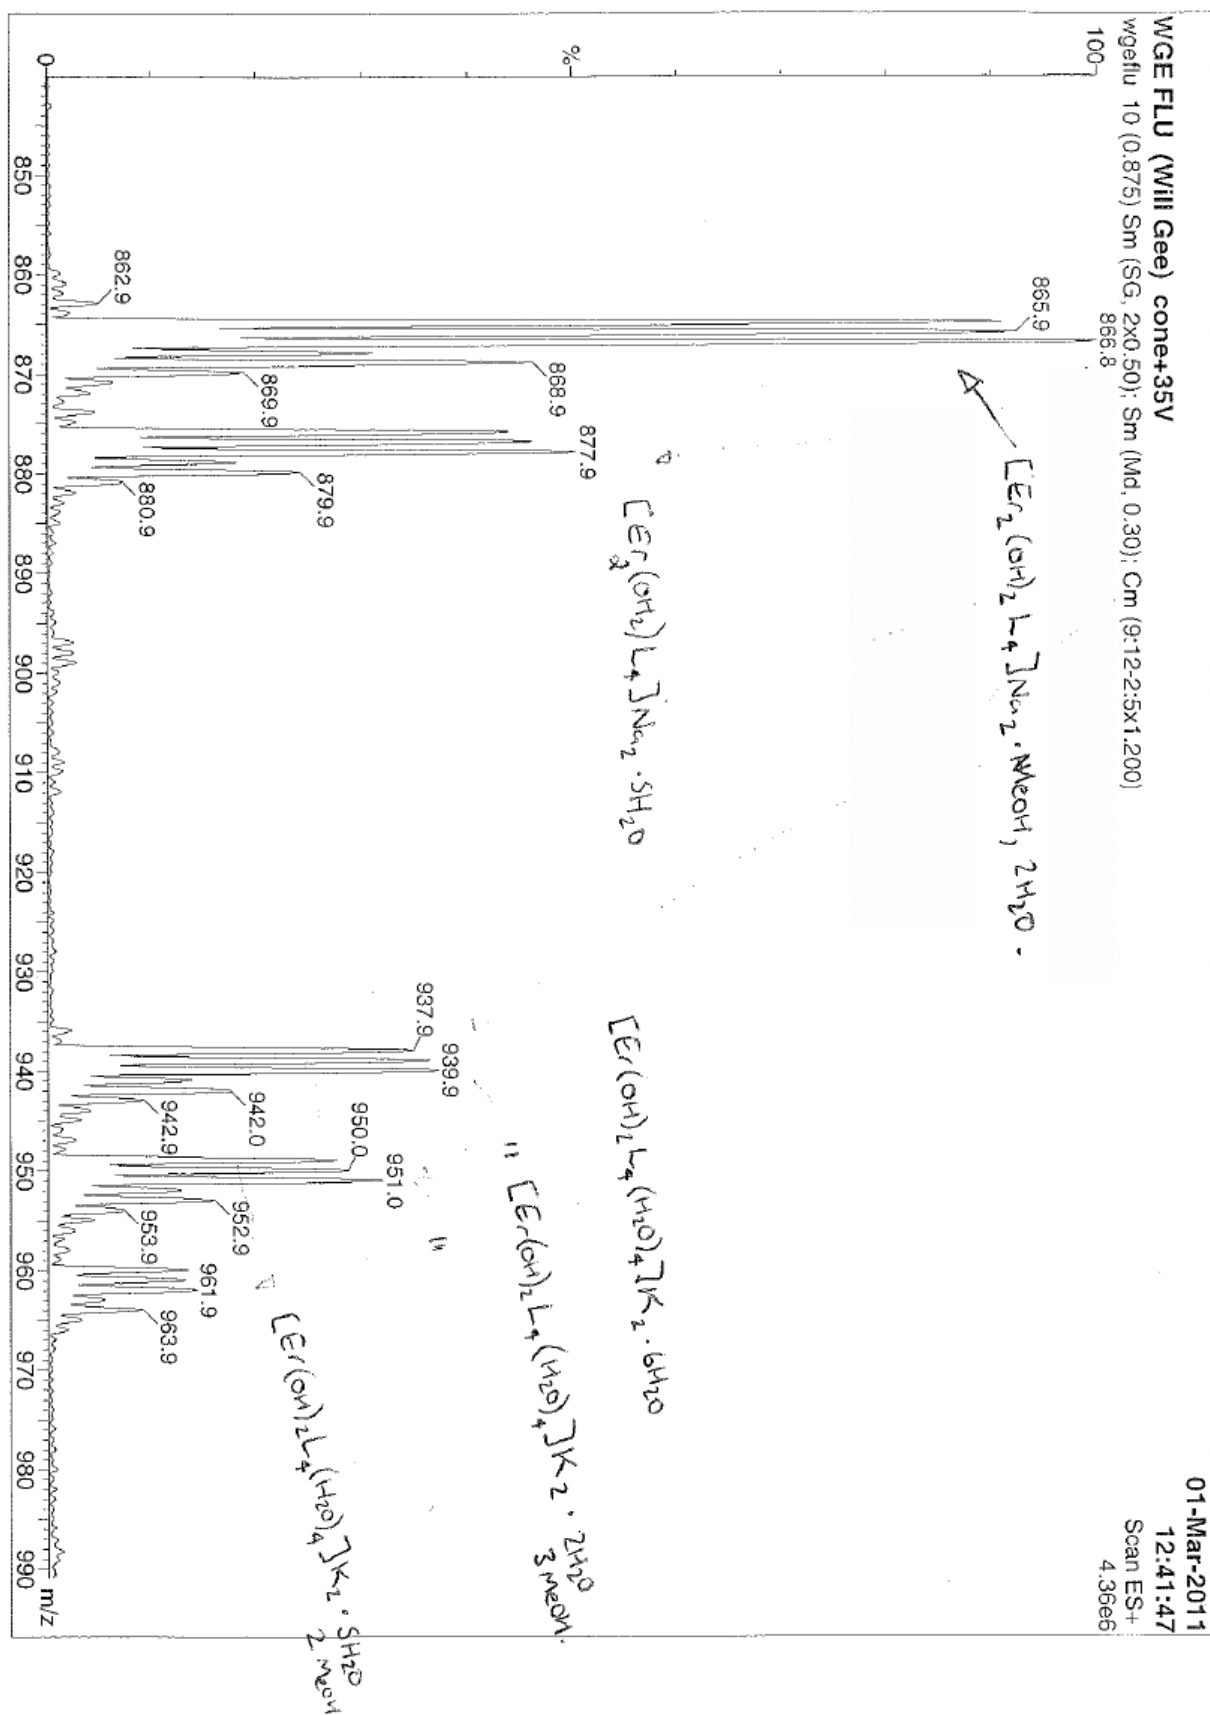

Supplement: c1dt10580a.pdf [file c1dt10580a.pdf]
